# Supplementary material for: A multi-omics study of circulating phospholipid markers of blood pressure
Source: medRxiv preprint, doi:10.1101/2020.12.08.20245050, version 1 (2020-12-11)
Supplement: Supplementary Figure [file 245050_file02.docx]

**Supplementary Figures**

**
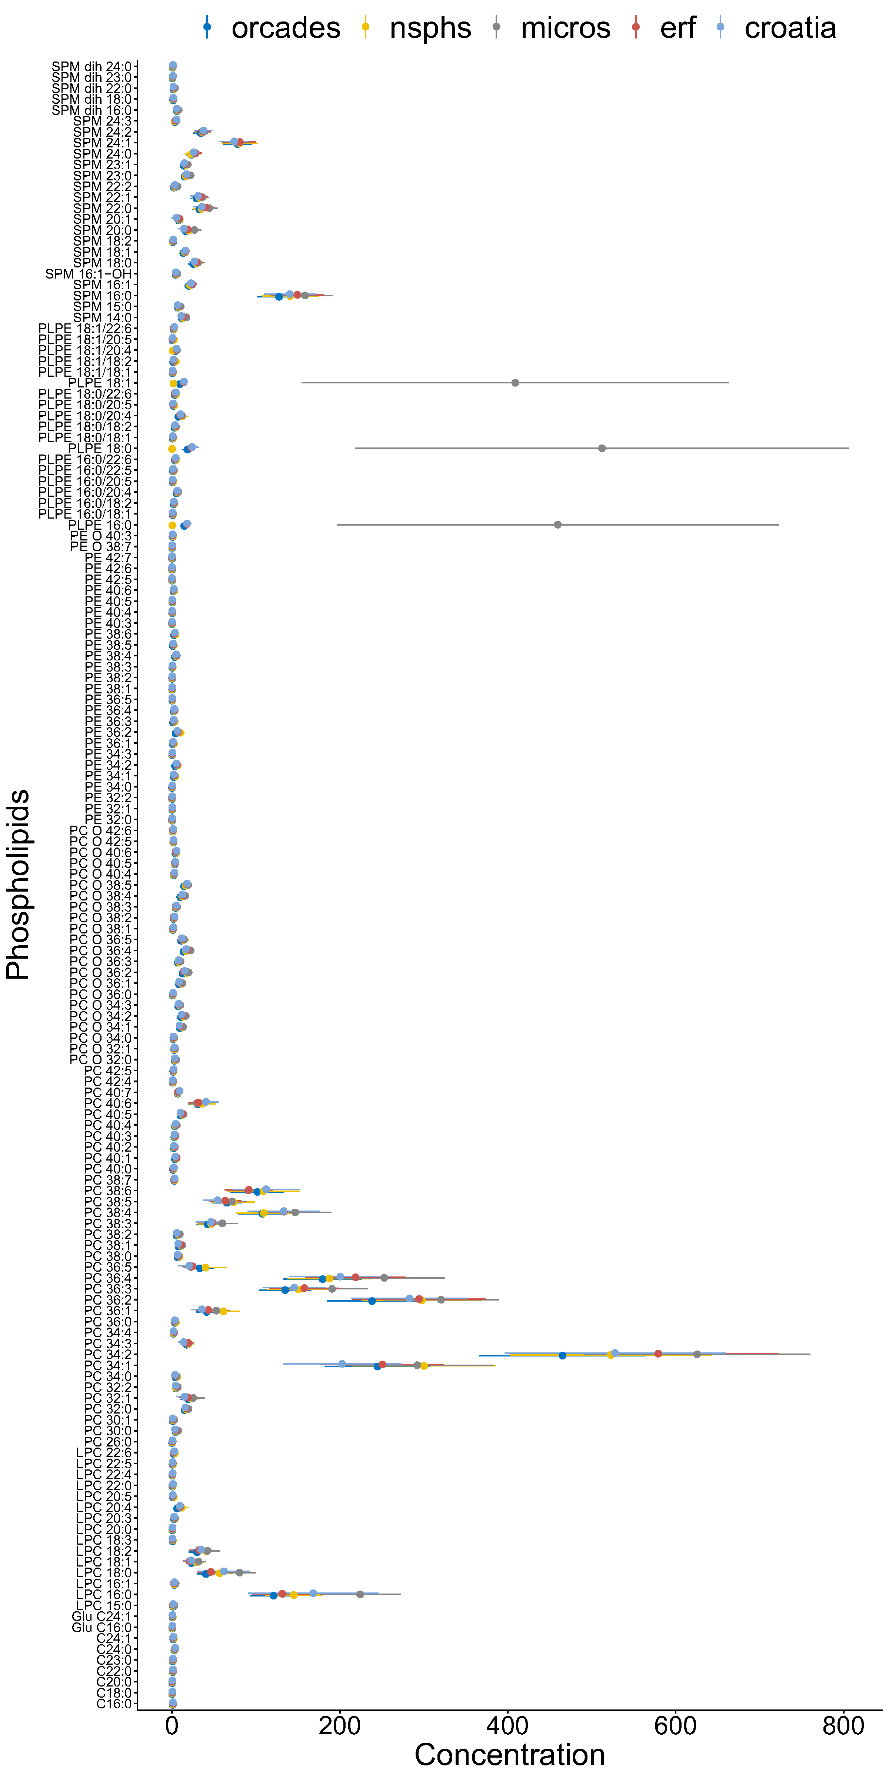
**

**Supplementary Figure 1** Mean and standard deviation of concentration of each phospholipid across cohorts.


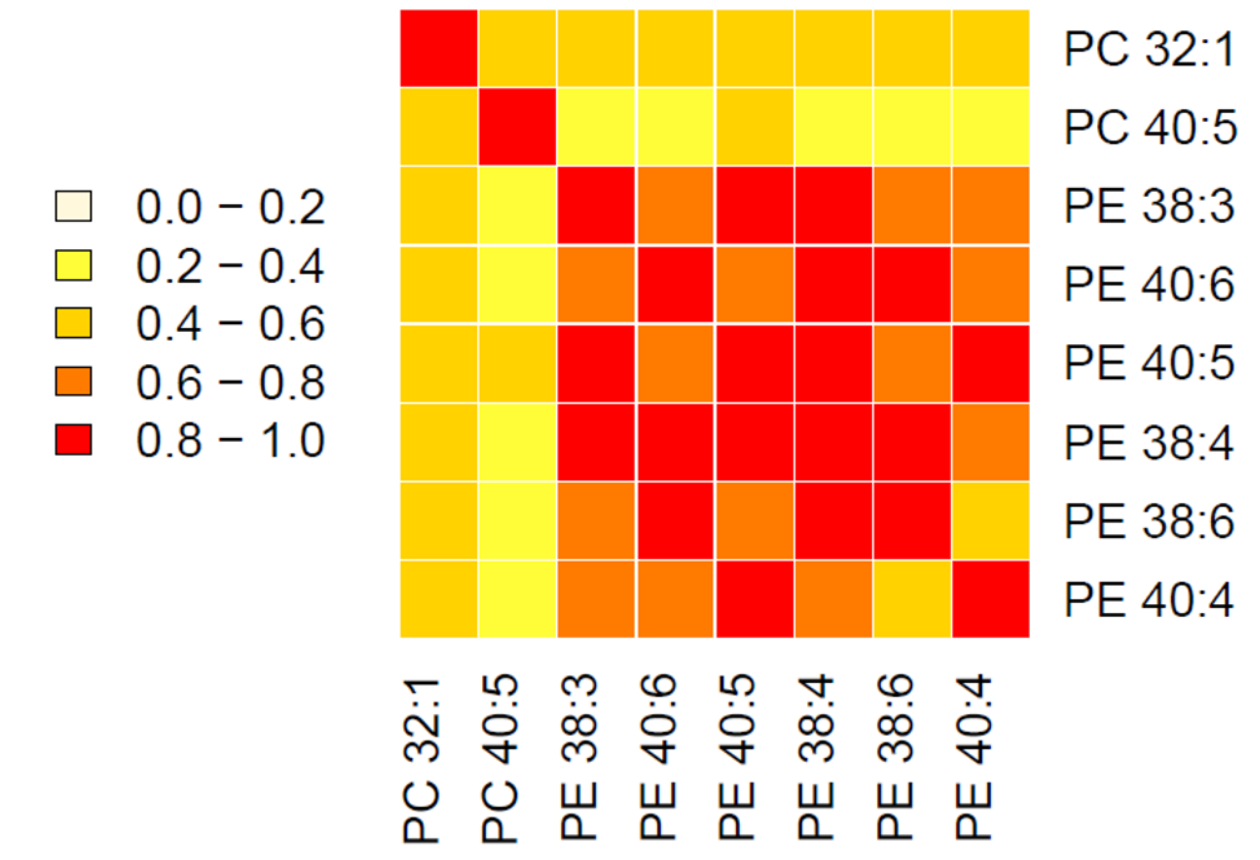


**Supplementary Figure 2 Heatmap of the correlation between the phospholipids associated with blood pressure.** The correlation was tested by Pearson's correlation in ERF (n=818).
